# Supplementary material
Source: Springer Nature journal article supplement (https://www.springermedizin.de/resource/supplementary/13045_2008_2_MOESM3_ESM.pdf/9660484)

Ratio HER2/B2M expression Normalized to Normal Control Sample 4

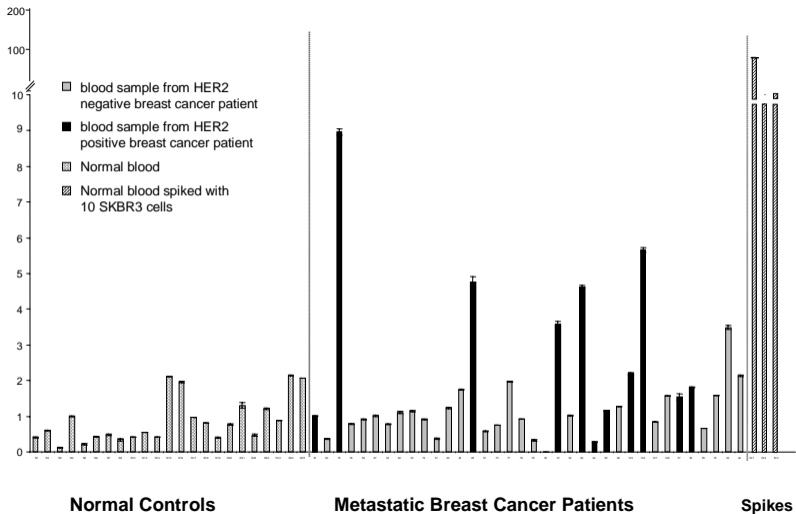

Supplement: MOESM3 [file 9660484]
